# Supplementary material for: Skullcapflavone II Inhibits Degradation of Type I Collagen by Suppressing MMP-1 Transcription in Human Skin Fibroblasts
Source: PubMed Central journal article supplement (PMC6600147; doi:10.3390/ijms20112734), 2019-06-04
Supplement: ijms-20-02734-s001.pdf [file ijms-20-02734-s001.pdf]

## **Supplementary Information**

### **Skullcapflavone II Inhibits Degradation of Type I Collagen by Suppressing MMP-1 Transcription in Human Skin Fibroblasts**

**Young Hun Lee <sup>1</sup>, Eun Kyoung Seo <sup>2</sup>, and Seung-Taek Lee <sup>1,\*</sup>**

<sup>1</sup> Department of Biochemistry, College of Life Science and Biotechnology, Yonsei University, Seoul 03722, Republic of Korea; isop\_tera@naver.com (Y.H.L.)

<sup>2</sup> Graduate school of Pharmaceutical Sciences, College of Pharmacy, Ewha Womans University, Seoul, 03790, Republic of Korea; yuny@ewha.ac.kr (E.K.S.)

\* Correspondence: stlee@yonsei.ac.kr; Tel.: +82-2-2123-2703

**Supplementary Table S1.** Primer sequences used for RT-qPCR analysis of *MMP-1* and *GAPDH* mRNA expression.

| <b>Gene</b>         | <b>Nucleotide sequence</b>                                       | <b>Nucleotide position</b> | <b>Annealing temperature (°C)</b> | <b>GenBank accession number</b> |
|---------------------|------------------------------------------------------------------|----------------------------|-----------------------------------|---------------------------------|
| <i><b>MMP-1</b></i> | F: 5'-GTACTGATATAATTTAGTTC-3'<br>R: 5'-GTTATCCCTTGCCTATCTAG-3'   | 1656-1675<br>1889-1908     | 45                                | NM_002421                       |
| <i><b>GAPDH</b></i> | F: 5'-ACTGCTTAGCACCCCTGGCCA-3'<br>R: 5'-TTGGCAGTGGGGACACGGAAG-3' | 488-508<br>720-740         | 62                                | BC023632                        |

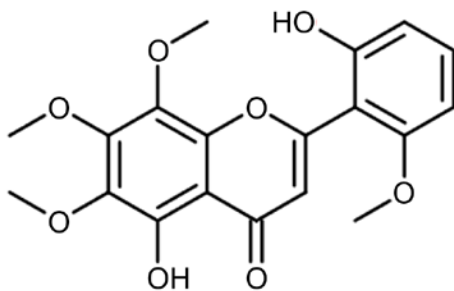

**Supplementary Figure S1.** Chemical structure of skullcapflavone II (5-hydroxy-2-[2-hydroxy-6-methoxyphenyl]-6,7,8-trimethoxychromen-4-one).

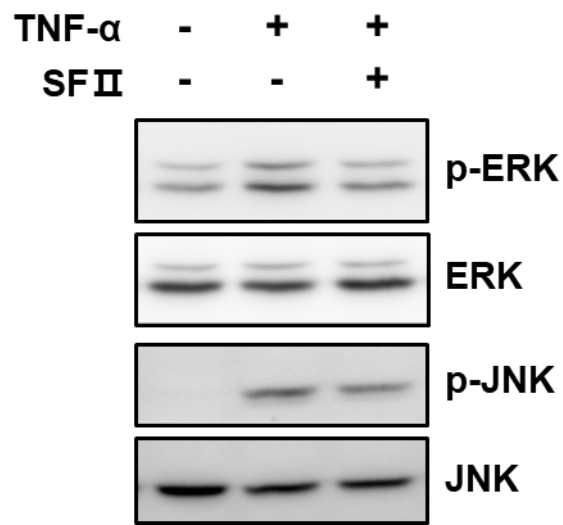

**Supplementary Figure S2.** Effect of skullcapflavone II on TNF- $\alpha$ -induced phosphorylation of ERK and JNK in foreskin fibroblasts.

Subconfluent foreskin fibroblasts were starved for 24 h in a serum-free medium, pre-incubated with (+) or without (-) 3  $\mu$ M skullcapflavone II for 30 min in a serum-free medium, and stimulated with (+) or without (-) 1 ng/ml TNF- $\alpha$  for 10 min. Cell lysates were prepared and analyzed by Western blot using antibodies against the indicated molecules.
